# Supplementary material for: Taxifolin Modulates Transcriptomic Response to Heat Stress in Rainbow Trout, Oncorhynchus mykiss
Source: MDPI journal article supplement (doi:10.3390/ani12101321), 2022-05-22
Supplement: s1 [file s1]

Table S5: Differentially expressed heat shock proteins in trout and their respective log-fold changes in the two HSyetsTno/HSyetsTyes contrasts.

| Transcript ID     | Closest Homolog in [62] | LFC in Taxifolin-treated Fish | LFC in Control Fish |
|-------------------|-------------------------|-------------------------------|---------------------|
| GSONMT00004379001 | hspa4L                  | 2.39                          | 4.40                |
| GSONMT00015093001 | hspa5L (BiP chaperone)  | 2.05                          | 2.45                |
| GSONMT00015921001 | hspa4L                  | 2.07                          | 2.42                |
| GSONMT00018153001 | hyou1                   | 1.64                          | 1.29                |
| GSONMT00020100001 | hsp70a                  | 4.22                          | 10.88               |
| GSONMT00021034001 | hsc70                   | 4.77                          | 4.71                |
| GSONMT00030559001 | hspa8b                  | 3.91                          | 3.06                |
| GSONMT00034833001 | hspa13                  | Not significant               | 2.19                |
| GSONMT00056342001 | hspa4L                  | -2.92                         | Not significant     |
| GSONMT00056362001 | hspa4L 1                | -3.44                         | Not significant     |
| GSONMT00064818001 | hsp70a or hsp70b        | 5.21                          | 8.89                |
| GSONMT00068455001 | hsa5 (BiP chaperone)    | 1.45                          | 1.88                |
| GSONMT00076716001 | hspa4L                  | Not significant               | Not significant     |
| GSONMT00077567001 | hyou2                   | 2.18                          | 2.6                 |
| GSONMT00082713001 | hspa4L                  | 1.76                          | 2.91                |
| GSONMT00002889001 | hsp47                   | Not significant               | Not significant     |
| GSONMT00020438001 | hsp47                   | 5.54                          | 6.11                |
| GSONMT00026598001 | hsp90aa                 | Not significant               | Not significant     |
| GSONMT00026599001 | hsp90ab                 | 11.63                         | 11.86               |
| GSONMT00028101001 | hsp90ba                 | 1.67                          | 1.59                |
| GSONMT00037918001 | Grp94                   | 4.66                          | 4.27                |
| GSONMT00079391001 | hsp90ba                 | 1.78                          | 2.33                |
| GSONMT00080902001 | hsp90aa1                | 4.86                          | 6.19                |

GSONMT00080903001

hsp90ab1

9.48

11.34

---
